# Supplementary material for: Characteristics and Usage Patterns Among 12,151 Paid Subscribers of the Calm Meditation App: Cross-Sectional Survey
Source: PubMed Central journal article supplement (PMC6858610; doi:10.2196/15648), 2019-11-03
Supplement: mhealth_v7i11e15648_app3.pdf [file mhealth_v7i11e15648_app3.pdf]

Multimedia Appendix 3.1. Self-Reported Reasons for Starting to Use Calm (N = 11870)

| Reason for starting Calm <sup>a</sup> | <i>n</i> (%)  |
|---------------------------------------|---------------|
| Improve sleep                         | 7475 (62.97%) |
| Improve stress                        | 7373 (62.11%) |
| Reduce depression or anxiety          | 6465 (54.47%) |
| Improve overall health                | 4754 (40.05%) |
| Curious                               | 1768 (14.89%) |
| Friend recommended the app            | 1717 (14.47%) |
| Someone bought it for me              | 197 (1.66%)   |
| Other                                 | 1321 (11.13%) |

<sup>a</sup>Participants were able to select multiple reasons for starting to use Calm

Multimedia Appendix 3.2. Differences in the Reasons for Starting Calm by Sleep Difficulties (N = 11380)

| Reason for starting Calm <sup>a</sup> | Sleep difficulties<br>( <i>N</i> = 8704), <i>n</i> (%) | No sleep difficulties<br>( <i>N</i> = 2676), <i>n</i> (%) | $\chi^2$ | <i>P</i> |
|---------------------------------------|--------------------------------------------------------|-----------------------------------------------------------|----------|----------|
| Improve sleep                         | 6597 (75.79)                                           | 579 (21.64)                                               | 2576.88  | > .001   |
| Improve stress                        | 5381 (61.82)                                           | 1699 (63.49)                                              | 2.42     | .12      |
| Reduce depression or anxiety          | 4796 (55.10)                                           | 1404 (52.47)                                              | 5.73     | .02      |
| Improve overall health                | 3218 (36.97)                                           | 1331 (49.74)                                              | 139.03   | > .001   |
| Curious                               | 1120 (12.87)                                           | 582 (21.75)                                               | 126.93   | > .001   |
| Friend recommended it app             | 12.38 (14.22)                                          | 409 (15.28)                                               | 1.86     | .17      |
| Someone bought it for me              | 140 (1.61)                                             | 45 (1.68)                                                 | .07      | .79      |
| Other                                 | 846 (9.72)                                             | 440 (16.44)                                               | 92.29    | > .001   |

<sup>a</sup>Participants were able to select multiple reasons for starting to use Calm
