# Supplementary material for: Characteristics and Usage Patterns Among 12,151 Paid Subscribers of the Calm Meditation App: Cross-Sectional Survey
Source: PubMed Central journal article supplement (PMC6858610; doi:10.2196/15648), 2019-11-03
Supplement: mhealth_v7i11e15648_app4.pdf [file mhealth_v7i11e15648_app4.pdf]

Multimedia Appendix 4.1. Use of Components of Calm App (N = 11841)

| Component         | Respondents regularly using component, <i>n</i> (%) |
|-------------------|-----------------------------------------------------|
| Meditations       | 9497 (80.02)                                        |
| Sleep Stories     | 6591 (55.66)                                        |
| Masterclass       | 1957 (16.53)                                        |
| Calm Body         | 1689 (14.26)                                        |
| Breathe Bubble    | 976 (8.24)                                          |
| Music             | 2674 (22.01)                                        |
| Background scenes | 3483 (28.66)                                        |
| Other             | 406 (3.34)                                          |

Multimedia Appendix 4.2. Sex Differences in the Components of Calm Regularly Used (N = 10955)

| Component      | Males ( <i>N</i> = 2177), <i>n</i> (%) | Females ( <i>N</i> = 8778), <i>n</i> (%) | $\chi^2$ | <i>P</i> |
|----------------|----------------------------------------|------------------------------------------|----------|----------|
| Meditations    | 1924 (88.38)                           | 6835 (77.87)                             | 120.30   | < .001   |
| Sleep Stories  | 771 (35.42)                            | 5304 (60.42)                             | 441.63   | < .001   |
| Masterclass    | 363 (16.67)                            | 1451 (16.53)                             | 0.03     | .87      |
| Calm Body      | 266 (12.22)                            | 1294 (14.74)                             | 9.09     | .003     |
| Breathe Bubble | 140 (6.43)                             | 748 (8.52)                               | 10.23    | .001     |
| Music          | 468 (21.50)                            | 1987 (22.64)                             | 1.30     | .25      |
| Backgrounds    | 570 (26.18)                            | 2653 (30.22)                             | 13.71    | < .001   |
| Other          | 79 (3.63)                              | 296 (3.37)                               | 0.35     | .56      |

Multimedia Appendix 4.3. Associations Between Age and the Components of Calm Regularly Used (N = 11014)

| Component      | B (Age) | SE    | Wald  | <i>df</i> | <i>P</i> | OR   | 95% CI        |
|----------------|---------|-------|-------|-----------|----------|------|---------------|
| Meditations    | -0.01   | 0.002 | 66.31 | 1         | < .001   | 0.99 | 0.98 – 0.99   |
| Sleep Stories  | 0.01    | 0.001 | 37.31 | 1         | < .001   | 1.01 | 1.006 – 1.011 |
| Masterclass    | -0.004  | 0.002 | 3.88  | 1         | .049     | 1.00 | 0.99 – 1.00   |
| Calm Body      | 0.02    | 0.002 | 64.26 | 1         | < .001   | 1.02 | 1.01 – 1.02   |
| Breathe Bubble | -0.01   | 0.003 | 32.93 | 1         | < .001   | 0.99 | 0.98 – 0.99   |
| Music          | -0.01   | 0.002 | 15.79 | 1         | < .001   | 0.99 | 0.99 – 1.00   |
| Backgrounds    | -0.01   | 0.002 | 16.39 | 1         | < .001   | 0.99 | 0.99 – 1.00   |
| Other          | 0.02    | .004  | 17.65 | 1         | < .001   | 1.02 | 1.01 – 1.02   |

Multimedia Appendix 4.4. Differences in the Components of Calm Regularly Used by Types of Health Diagnoses (N = 11061)

| Component         | MH only<br>(N = 2729),<br>n (%) | PH only<br>(N = 1740),<br>n (%) | MH and PH<br>(N = 1820),<br>n (%) | None<br>(N = 4772),<br>n (%) | $X_3^2$ | P      |
|-------------------|---------------------------------|---------------------------------|-----------------------------------|------------------------------|---------|--------|
| Meditation        | 2279 (83.51)                    | 1325 (76.15)                    | 1434 (78.79)                      | 3808 (79.80)                 | 38.88   | < .001 |
| Sleep Stories     | 1515 (55.51)                    | 1021 (58.68)                    | 1116 (61.32)                      | 2495 (52.28)                 | 52.04   | < .001 |
| Masterclass       | 432 (15.83)                     | 258 (14.83)                     | 307 (16.87)                       | 835 (17.50)                  | 7.99    | .046   |
| Calm Body         | 370 (13.56)                     | 269 (15.46)                     | 355 (19.51)                       | 585 (12.26)                  | 59.68   | < .001 |
| Breathe Bubble    | 265 (9.71)                      | 128 (7.36)                      | 175 (9.62)                        | 342 (7.17)                   | 21.45   | < .001 |
| Music             | 652 (23.89)                     | 371 (21.32)                     | 463 (25.44)                       | 1021 (21.40)                 | 16.51   | .001   |
| Background scenes | 842 (30.85)                     | 517 (29.71)                     | 651 (35.77)                       | 1270 (26.61)                 | 55.66   | < .001 |
| Other             | 68 (2.49)                       | 74 (4.25%)                      | 75 (4.12)                         | 158 (3.31)                   | 13.74   | .003   |

Multimedia Appendix 4.5. Pairwise Comparisons of the Components of Calm Regularly Used by Types of Health Diagnoses (N = 11061)

| Component         | MH only (A)                                     | PH only (B)   | MH and PH (C)                                   | None (D)     |
|-------------------|-------------------------------------------------|---------------|-------------------------------------------------|--------------|
| Meditation        | B, $P < .001$<br>C, $P < .001$<br>D, $P < .001$ |               |                                                 | B, $P = .01$ |
| Sleep Stories     | D, $P = .04$                                    | D, $P < .001$ | A, $P = .001$<br>D, $P < .001$                  |              |
| Masterclass       |                                                 |               |                                                 |              |
| Calm Body         |                                                 | D, $P = .004$ | A, $P < .001$<br>B, $P = .01$<br>D, $P < .001$  |              |
| Breathe Bubble    | B, $P = .04$<br>D, $P = .001$                   |               | D, $P = .01$                                    |              |
| Music             |                                                 |               | B, $P = .02$<br>D, $P = .003$                   |              |
| Background scenes | D, $P = .001$                                   |               | A, $P = .003$<br>B, $P = .001$<br>D, $P < .001$ |              |
| Other             |                                                 | A, $P = .01$  | A, $P = .01$                                    |              |

Results are based on two-sided tests. For each significant pair, the key of the category with the smaller column proportion appears in the category with the larger column proportion.

Significance level for upper case letters (A, B, C, D) = .05.

Tests are adjusted for all pairwise comparisons within a row of each innermost subtable using the Bonferroni correction.

Multimedia Appendix 4.6. Differences in the Components of Calm Regularly Used by Sleep Difficulties (N = 11380)

| Component         | Sleep difficulties<br>(N = 8527), n (%) | No sleep difficulties<br>(N = 2604), n (%) | $\chi^2$ | P      |
|-------------------|-----------------------------------------|--------------------------------------------|----------|--------|
| Meditation        | 6677 (76.71)                            | 2431 (90.84)                               | 255.84   | < .001 |
| Sleep Stories     | 5589 (64.21)                            | 755 (28.21)                                | 1075.12  | < .001 |
| Masterclass       | 1374 (15.79)                            | 497 (18.57)                                | 11.57    | .001   |
| Calm Body         | 1257 (14.44)                            | 365 (13.64)                                | 1.08     | .30    |
| Breathe Bubble    | 699 (8.03)                              | 244 (9.12)                                 | 3.18     | .07    |
| Music             | 1980 (22.75)                            | 584 (21.84)                                | 1.00     | .32    |
| Background scenes | 2570 (29.53)                            | 770 (28.77)                                | 0.56     | .46    |
| Other             | 296 (3.40)                              | 93 (3.48)                                  | .04      | .85    |
