# Supplementary material for: Characteristics and Usage Patterns Among 12,151 Paid Subscribers of the Calm Meditation App: Cross-Sectional Survey
Source: PubMed Central journal article supplement (PMC6858610; doi:10.2196/15648), 2019-11-03
Supplement: mhealth_v7i11e15648_app5.pdf [file mhealth_v7i11e15648_app5.pdf]

Multimedia Appendix 5.1 Differences in Noticing Changes in Mental Health (N = 11170), Physical Health (N = 11161), Stress (N = 11123), and Sleep (N = 11189) Based on Frequency of Using of Calm Components

| Component and reported changes after using | < 1 time,<br><i>n</i> (%) | 1-2 times,<br><i>n</i> (%) | 3-4 times,<br><i>n</i> (%) | ≥ 5 times,<br><i>n</i> (%) | $X_3^2$ | <i>P</i> |
|--------------------------------------------|---------------------------|----------------------------|----------------------------|----------------------------|---------|----------|
| <b>Meditations</b>                         |                           |                            |                            |                            |         |          |
| Mental health                              | 1209 (54.56)              | 1490 (78.46)               | 2430 (85.96)               | 3862 (91.34)               | 1325.02 | < .001   |
| Physical health                            | 1053 (47.14)              | 973 (51.51)                | 1598 (56.47)               | 2573 (61.15)               | 130.86  | < .001   |
| Stress                                     | 1192 (53.94)              | 1428 (75.76)               | 2386 (84.61)               | 3718 (88.36)               | 1100.47 | < .001   |
| Sleep                                      | 1890 (84.07)              | 1304 (69.03)               | 1812 (63.98)               | 2778 (65.83)               | 293.30  | < .001   |
| <b>Sleep Stories</b>                       |                           |                            |                            |                            |         |          |
| Mental health                              | 4272 (85.78)              | 1696 (80.46)               | 1381 (74.69)               | 1642 (73.53)               | 197.31  | < .001   |
| Physical health                            | 2721 (54.84)              | 1113 (52.92)               | 1016 (54.65)               | 1347 (60.21)               | 27.21   | < .001   |
| Stress                                     | 4181 (84.24)              | 1607 (77.00)               | 1341 (72.53)               | 1595 (71.72)               | 199.01  | < .001   |
| Sleep                                      | 2551 (50.84)              | 1545 (73.47)               | 1641 (87.94)               | 2077 (91.86)               | 1665.31 | < .001   |
| <b>Masterclass</b>                         |                           |                            |                            |                            |         |          |
| Mental health                              | 7390 (78.70)              | 1425 (90.13)               | 149 (89.22)                | 27 (84.38)                 | 121.18  | < .001   |
| Physical health                            | 5044 (53.79)              | 1019 (64.41)               | 110 (65.09)                | 24 (72.73)                 | 72.23   | < .001   |
| Stress                                     | 7143 (76.44)              | 1403 (88.85)               | 153 (91.07)                | 25 (80.65)                 | 139.33  | < .001   |
| Sleep                                      | 6547 (69.59)              | 1088 (68.86)               | 121 (72.02)                | 28 (84.85)                 | 4.94    | .213     |
| <b>Calm Body</b>                           |                           |                            |                            |                            |         |          |
| Mental health                              | 7640 (76.53)              | 823 (85.64)                | 384 (86.69)                | 144 (90.00)                | 41.86   | < .001   |
| Physical health                            | 5140 (53.56)              | 621 (64.62)                | 316 (71.33)                | 120 (75.00)                | 116.62  | < .001   |
| Stress                                     | 7383 (77.21)              | 812 (84.67)                | 393 (88.51)                | 136 (86.08)                | 62.62   | < .001   |
| Sleep                                      | 6660 (69.22)              | 660 (68.61)                | 347 (77.80)                | 117 (73.13)                | 16.20   | .001     |
| <b>Breathe Bubble</b>                      |                           |                            |                            |                            |         |          |
| Mental health                              | 8184 (79.77)              | 585 (88.64)                | 166 (88.30)                | 56 (90.32)                 | 42.44   | < .001   |
| Physical health                            | 5626 (54.88)              | 405 (61.27)                | 124 (66.67)                | 42 (67.74)                 | 26.68   | < .001   |
| Stress                                     | 7928 (77.60)              | 581 (88.03)                | 160 (86.02)                | 55 (91.67)                 | 52.71   | < .001   |
| Sleep                                      | 7162 (69.66)              | 436 (66.46)                | 136 (71.96)                | 50 (80.65)                 | 7.13    | .07      |
| <b>Music</b>                               |                           |                            |                            |                            |         |          |
| Mental health                              | 6957 (80.29)              | 965 (82.98)                | 635 (77.34)                | 434 (83.30)                | 12.59   | .01      |
| Physical health                            | 4700 (54.34)              | 675 (57.94)                | 483 (58.69)                | 339 (64.82)                | 29.33   | < .001   |
| Stress                                     | 6683 (77.43)              | 964 (83.32)                | 653 (79.73)                | 424 (82.17)                | 26.54   | < .001   |
| Sleep                                      | 5955 (68.57)              | 803 (69.22)                | 611 (74.15)                | 415 (79.65)                | 37.33   | < .001   |
| <b>Backgrounds</b>                         |                           |                            |                            |                            |         |          |
| Mental health                              | 6199 (78.51)              | 850 (81.34)                | 751 (83.35)                | 1191 (89.68)               | 96.42   | < .001   |
| Physical health                            | 4185 (53.00)              | 569 (84.61)                | 573 (63.81)                | 870 (65.66)                | 100.79  | < .001   |
| Stress                                     | 5981 (76.10)              | 835 (80.06)                | 751 (83.44)                | 1157 (87.59)               | 105.60  | < .001   |
| Sleep                                      | 5406 (68.32)              | 691 (66.38)                | 687 (75.74)                | 1000 (75.30)               | 47.80   | < .001   |
| <b>Other</b>                               |                           |                            |                            |                            |         |          |
| Mental health                              | 8687 (80.34)              | 101 (81.45)                | 85 (83.33)                 | 129 (88.97)                | 7.34    | .06      |
| Physical health                            | 5968 (55.30)              | 73 (59.84)                 | 59 (57.84)                 | 97 (67.36)                 | 9.54    | .02      |
| Stress                                     | 8426 (78.31)              | 96 (79.34)                 | 79 (78.22)                 | 123 (87.23)                | 6.62    | .09      |
| Sleep                                      | 7527 (69.57)              | 80 (64.52)                 | 72 (71.29)                 | 105 (72.92)                | 2.40    | .49      |

Multimedia Appendix 5.2. Pairwise Comparisons of Noticing Changes in Mental Health, Physical Health, Stress, and Sleep Based on Frequency of Using of Calm Components

| Component and reported changes after using | < 1 time (A)                                    | 1-2 times (B)                  | 3-4 times (C)                  | ≥ 5 times (D)                                   |
|--------------------------------------------|-------------------------------------------------|--------------------------------|--------------------------------|-------------------------------------------------|
| <b>Meditations</b>                         |                                                 |                                |                                |                                                 |
| Mental health                              |                                                 | A, $P < .001$                  | A, $P < .001$<br>B, $P = .01$  | A, $P < .001$<br>B, $P < .001$<br>C, $P = .001$ |
| Physical health                            |                                                 | A, $P = .03$                   | A, $P < .001$<br>B, $P = .01$  | A, $P < .001$<br>B, $P < .001$<br>C, $P = .001$ |
| Stress                                     |                                                 | A, $P < .001$                  | A, $P < .001$<br>B, $P < .001$ | A, $P < .001$<br>B, $P < .001$<br>C, $P < .001$ |
| Sleep                                      | B, $P < .001$<br>C, $P < .001$<br>D, $P < .001$ | C, $P = .002$                  |                                |                                                 |
| <b>Sleep Stories</b>                       |                                                 |                                |                                |                                                 |
| Mental health                              | B, $P < .001$<br>C, $P < .001$<br>D, $P < .001$ | C, $P < .001$<br>D, $P < .001$ |                                |                                                 |
| Physical health                            |                                                 |                                |                                | A, $P < .001$<br>B, $P < .001$<br>C, $P = .002$ |
| Stress                                     | B, $P < .001$<br>C, $P < .001$<br>D, $P < .001$ | C, $P = .01$<br>D, $P < .001$  |                                |                                                 |
| Sleep                                      |                                                 | A, $P < .001$                  | A, $P < .001$<br>B, $P < .001$ | A, $P < .001$<br>B, $P < .001$<br>C, $P < .001$ |
| <b>Masterclass</b>                         |                                                 |                                |                                |                                                 |
| Mental health                              |                                                 | A, $P < .001$                  | A, $P = .01$                   |                                                 |
| Physical health                            |                                                 | A, $P < .001$                  | A, $P = .02$                   |                                                 |
| Stress                                     |                                                 | A, $P < .001$                  | A, $P < .001$                  |                                                 |
| Sleep                                      |                                                 |                                |                                |                                                 |
| <b>Calm Body</b>                           |                                                 |                                |                                |                                                 |
| Mental health                              |                                                 | A, $P < .001$                  | A, $P = .001$                  | A, $P = .01$                                    |
| Physical health                            |                                                 | A, $P < .001$                  | A, $P < .001$                  | A, $P < .001$                                   |
| Stress                                     |                                                 | A, $P < .001$                  | A, $P < .001$                  | A, $P = .050$                                   |

|                   |               |                                |                                                 |
|-------------------|---------------|--------------------------------|-------------------------------------------------|
| Sleep             |               | A, $P = .001$<br>B, $P = .002$ |                                                 |
| Breathe Bubble    |               |                                |                                                 |
| Mental health     | A, $P < .001$ | A, $P = .02$                   |                                                 |
| Physical health   | A, $P = .01$  | A, $P = .01$                   |                                                 |
| Stress            | A, $P < .001$ | A, $P = .04$                   |                                                 |
| Sleep             |               |                                |                                                 |
| Music             |               |                                |                                                 |
| Mental health     | C, $P = .01$  |                                | C, $P = .049$                                   |
| Physical health   |               |                                | A, $P < .001$<br>B, $P = .046$                  |
| Stress            | A, $P < .001$ |                                |                                                 |
| Sleep             |               | A, $P = .01$                   | A, $P < .001$<br>B, $P < .001$                  |
| Background scenes |               |                                |                                                 |
| Mental health     |               | A, $P = .004$                  | A, $P < .001$<br>B, $P < .001$<br>C, $P < .001$ |
| Physical health   |               | A, $P < .001$<br>B, $P < .001$ | A, $P < .001$<br>B, $P < .001$                  |
| Stress            | A, $P = .03$  | A, $P < .001$                  | A, $P < .001$<br>B, $P < .001$<br>C, $P = .04$  |
| Sleep             |               | A, $P < .001$<br>B, $P < .001$ | A, $P < .001$<br>B, $P < .001$                  |
| Other             |               |                                |                                                 |
| Mental health     |               |                                |                                                 |
| Physical health   |               |                                | A, $P = .02$                                    |
| Stress            |               |                                |                                                 |
| Sleep             |               |                                |                                                 |

---

Note. For each significant pair, the key of the category with the smaller column proportion appears in the category with the larger column proportion. Significance level for upper case letters (A, B, C, D): 05. Tests are adjusted for all pairwise comparisons within a row using the Bonferroni correction.
